# Supplementary material for: Translational repression by an RNA-binding protein promotes differentiation to infective forms in Trypanosoma cruzi
Source: PubMed Central journal article supplement (PMC6002132; doi:10.1371/journal.ppat.1007059), 2018-06-04
Supplement: ppat.1007059.s009.pdf [file ppat.1007059.s009.pdf]

S1 Table. Individual measurements of FNK angles in induced epimastigotes expressing TcUBP1-GFP or GFP.

|                 | <b>TcUBP1-GFP</b> | <b>GFP</b>       |
|-----------------|-------------------|------------------|
| <b>Parasite</b> | <b>FNK Angle</b>  | <b>FNK Angle</b> |
| 1               | 76.26             | 55.89            |
| 2               | 81.28             | 16.69            |
| 3               | 87.21             | 30.61            |
| 4               | 30.75             | 32.77            |
| 5               | 49.42             | 43.20            |
| 6               | 81.15             | 24.29            |
| 7               | 110.09            | 21.26            |
| 8               | 64.31             | 15.95            |
| 9               | 44.24             | 20.39            |
| 10              | 67.28             | 16.17            |
| 11              | 167.32            | 10.29            |
| 12              | 88.28             | 16.83            |
| 13              | 112.03            | 49.55            |
| 14              | 75.75             | 15.31            |
| 15              | 34.35             | 22.05            |
| 16              | 77.91             | 21.52            |
| 17              | 25.87             | 17.43            |
| 18              | 55.99             | 40.44            |
| 19              | 123.91            | 7.40             |
| 20              | 49.33             | 2.74             |
| 21              | 147.80            | 35.96            |
| 22              | 158.04            | 14.19            |
| 23              | 122.38            | 1.62             |
| 24              | 141.05            | 10.69            |
| 25              | 46.57             | 28.23            |
| 26              | 23.41             | 47.81            |
| 27              | 51.20             | 7.87             |
| 28              | 62.12             | 18.35            |
| 29              | 92.71             | 28.54            |
| 30              | 125.09            | 0.56             |
| 31              | 97.26             | 47.78            |
| 32              | 121.96            | 19.36            |

|                 | <b>TcUBP1-GFP</b> | <b>GFP</b>       |
|-----------------|-------------------|------------------|
| <b>Parasite</b> | <b>FNK Angle</b>  | <b>FNK Angle</b> |
| 33              | 44.07             | 2.49             |
| 34              | 70.85             | 20.21            |
| 35              | 57.73             | 18.43            |
| 36              | 76.19             | 24.03            |
| 37              | 117.90            | 43.04            |
| 38              | 122.40            | 22.17            |
| 39              | 124.99            | 22.80            |
| 40              | 30.29             | 7.35             |
| 41              | 37.24             | 6.74             |
| 42              | 50.18             | 27.27            |
| 43              | 64.01             | 0.89             |
| 44              | 41.55             | 9.33             |
| 45              | 48.41             | 14.55            |
| 46              | 78.36             | 16.31            |
| 47              | 66.62             | 21.03            |
| 48              | 60.13             | 14.99            |
| 49              | 155.29            | 11.74            |
| 50              | 86.01             | 82.25            |
| 51              | 115.50            | 43.88            |
| 52              | 28.72             | 29.65            |
| 53              | 19.28             | 32.21            |
| 54              | 59.04             | 30.63            |
| 55              | 82.24             | 16.68            |
| 56              | 163.83            | 19.86            |
| 57              | 125.75            | 31.74            |
| 58              | 38.26             | 4.84             |
| 59              | 148.13            |                  |
| 60              | 72.08             |                  |
| 61              | 88.81             |                  |
| 62              | 44.01             |                  |
| 63              | 39.38             |                  |
| 64              | 148.46            |                  |
